# Supplementary material
Source: publisher figshare collection journal article supplement (https://frontiersin.figshare.com/ndownloader/files/25661966)
Supplement: Supplementary file 1 [file 25661966]

Supplemental Material Table 1: Complete list of EQIP practices sorted by total dollars invested from 2009-2018, provided via public records request from the Strategic Information Team in the Resource Economics and Analysis Division of the Natural Resources Conservation Service, including categorizations utilized in this analysis. Italics notes practices that were determined to be "interim" and were not analyzed further.

| **NRCS Practice Code** | **Practice Name** | **Type** | **Transition to ecologically-based management** | **Soil Health Outcome** | **Adaptive Strategy** | **Total payments 2009-2018 (USD)** |
| --- | --- | --- | --- | --- | --- | --- |
| 442 | Sprinkler System | structure or facility | L1 | not_applicable | Resistance | 465,130,798.71 |
| 313 | Waste Storage Facility | structure or facility | L1 | not_applicable | Resistance | 458,939,310.74 |
| 382 | Fence | structure or facility | NEI | 2 | Resistance | 420,807,237.09 |
| 340 | Cover Crop | in-situ practice on managed land | L3 | 4 | Resilience | 406,855,053.33 |
| 314 | Brush Management | in-situ practice on managed land | L1 | 1 | Resistance | 392,147,758.38 |
| 441 | Irrigation System, Microirrigation | structure or facility | L1 | not_applicable | Resistance | 263,909,549.76 |
| 430 | Irrigation Pipeline | structure or facility | L1 | not_applicable | Resistance | 253,678,869.05 |
| 516 | Livestock Pipeline | structure or facility | L1 | not_applicable | Resistance | 233,478,274.76 |
| 561 | Heavy Use Area Protection | boundary practice | not_applicable | not_applicable | Resistance | 203,890,639.82 |
| 512 | Forage and Biomass Planting | in-situ practice on managed land | L3 | 4 | Resilience | 192,483,748.52 |
| 367 | Roofs and Covers | structure or facility | not_applicable | not_applicable | Resistance | 166,786,217.72 |
| 666 | Forest Stand Improvement | in-situ practice on managed land | L3 | 4 | Resistance | 166,560,467.89 |
| 372 | Combustion System Improvement | structure or facility | not_applicable | not_applicable | Resistance | 163,104,943.62 |
| 533 | Pumping Plant | structure or facility | not_applicable | not_applicable | Resistance | 160,582,890.78 |
| 614 | Watering Facility | in-situ practice on managed land | L3 | 2 | Resilience | 150,427,063.77 |
| 590 | Nutrient Management | in-situ practice on managed land | L1 | 1 | Resistance | 140,309,394.30 |
| 528 | Prescribed Grazing | in-situ practice on managed land | L3 | 4 | Resilience | 115,964,155.89 |
| 612 | Tree/Shrub Establishment | in-situ practice on managed land | L3 | 4 | Transformation | 107,485,940.04 |
| 464 | Irrigation Land Leveling | in-situ practice on managed land | L1 | NEG | Resistance | 103,814,255.67 |
| 642 | Water Well | structure or facility | L1 | not_applicable | Resistance | 101,146,530.93 |
| 620 | Underground Outlet | structure or facility | L1 | 2 | Resistance | 95,602,414.70 |
| 600 | Terrace | in-situ practice on managed land | L3 | 4 | Resistance | 94,930,987.14 |
| 329 | Residue and Tillage Management, No-Till | in-situ practice on managed land | L2 | 2 | Resilience | 91,972,949.10 |
| 328 | Conservation Crop Rotation | in-situ practice on managed land | L3 | 4 | Resilience | 90,671,717.62 |
| 587 | Structure for Water Control | structure or facility | L1 | not_applicable | Resistance | 89,145,542.55 |
| 490 | Tree/Shrub Site Preparation | in-situ practice on managed land | L1 | not_applicable | Resilience | 74,840,974.60 |
| 595 | Integrated Pest Management (IPM) | in-situ practice on managed land | L2 | 4 | Resilience | 65,582,426.25 |
| 580 | Streambank and Shoreline Protection | boundary practice | L1 | 2 | Resistance | 65,003,383.90 |
| 634 | Waste Transfer | structure or facility | L1 | not_applicable | Resistance | 62,914,692.12 |
| 374 | FARMSTEAD ENERGY IMPROVEMENT | structure or facility | L1 | not_applicable | Resistance | 61,172,373.17 |
| 550 | Range Planting | in-situ practice on managed land | L3 | 4 | Resistance | 56,255,957.94 |
| 378 | Pond | in-situ practice on managed land | L1 | 1 | Resistance | 53,311,856.70 |
| 325 | High Tunnel System | structure or facility | NEI | NEI | Resistance | 53,302,645.44 |
| 316 | Animal Mortality Facility | structure or facility | not_applicable | not_applicable | Resistance | 52,940,237.46 |
| 436 | Irrigation Reservoir | structure or facility | L1 | not_applicable | Resistance | 49,520,574.22 |
| 102 | Comprehensive Nutrient Management Plan - Written | plan | none | none | none | 47,768,565.27 |
| 384 | Woody Residue Treatment | in-situ practice on managed land | L1 | not_applicable | Resistance | 44,452,865.25 |
| 449 | Irrigation Water Management | plan | L1 | not_applicable | Resistance | 43,171,030.78 |
| 645 | Upland Wildlife Habitat Management | in-situ practice on managed land | L3 | 4 | Resilience | 42,538,096.39 |
| 430DD | Irrigation Water Conveyance, Pipeline, High-Pressure, Underground, Plastic | structure or facility | L1 | not_applicable | Resistance | 41,404,448.13 |
| 560 | Access Road | boundary practice | not_applicable | not_applicable | Resistance | 37,213,341.12 |
| 412 | Grassed Waterway | in-situ practice on managed land | L3 | 4 | Resistance | 36,837,994.35 |
| 638 | Water and Sediment Control Basin | boundary practice | L1 | 2 | Resistance | 36,316,633.82 |
| 345 | Residue and Tillage Management, Reduced Till | in-situ practice on managed land | L2 | 2 | Resilience | 35,197,899.66 |
| 315 | Herbaceous Weed Control | in-situ practice on managed land | L1 | 3 | Resistance | 31,795,337.50 |
| 338 | Prescribed Burning | in-situ practice on managed land | L3 | 3 | Resistance | 31,501,037.01 |
| 484 | Mulching | in-situ practice on managed land | L2 | 2 | Resistance | 31,272,787.14 |
| 309 | Agrichemical Handling Facility | structure or facility | not_applicable | not_applicable | Resistance | 30,045,524.51 |
| 500 | Obstruction Removal | boundary practice | L1 | not_applicable | Resistance | 29,331,418.30 |
| 317 | Composting Facility | structure or facility | L2 | 1 | Resilience | 27,290,305.07 |
| 578 | Stream Crossing | structure or facility | L1 | not_applicable | Resistance | 26,497,611.21 |
| 606 | Subsurface Drain | structure or facility | L1 | 2 | Resistance | 25,725,269.09 |
| 430EE | Irrigation Water Conveyance, Pipeline, Low-Pressure, Underground, Plastic | structure or facility | L1 | not_applicable | Resistance | 25,421,942.53 |
| 356 | Dike | structure or facility | not_applicable | not_applicable | Resistance | 24,993,079.24 |
| 672 | Building Envelope Improvement | structure or facility | L1 | not_applicable | Resistance | 24,964,691.30 |
| 394 | Firebreak | boundary practice | not_applicable | not_applicable | Resistance | 24,590,045.80 |
| 106 | Forest Management Plan - Written | plan | none | none | none | 22,441,454.88 |
| 360 | Waste Facility Closure | structure or facility | L1 | not_applicable | Resistance | 21,823,107.24 |
| 327 | Conservation Cover | in-situ practice on managed land | L3 | 4 | Resilience | 21,536,265.12 |
| 472 | Access Control | structure or facility | NEI | 2 | Resistance | 19,972,499.83 |
| 646 | Shallow Water Development and Management | in-situ practice on managed land | L3 | 4 | Resistance | 19,636,742.42 |
| 443 | Irrigation System, Surface and Subsurface | structure or facility | L1 | not_applicable | Resistance | 18,157,580.00 |
| 591 | Amendments for the Treatment of Agricultural Waste | boundary practice | not_applicable | not_applicable | Resistance | 16,680,289.65 |
| 428 | Irrigation Ditch Lining | structure or facility | L1 | not_applicable | Resistance | 15,895,164.29 |
| 575 | Trails and Walkways | boundary practice | L1 | 2 | Resistance | 15,479,587.57 |
| 342 | Critical Area Planting | boundary practice | NEI | 4 | Resistance | 15,470,595.29 |
| 521A | Pond Sealing or Lining, Flexible Membrane | structure or facility | not_applicable | not_applicable | Resistance | 15,386,395.78 |
| 643 | Restoration and Management of Rare and Declining Habitats | plan | L3 | 4 | Resilience | 14,288,446.05 |
| 647 | Early Successional Habitat Development/Management | in-situ practice on managed land | L3 | 4 | Resilience | 14,222,070.93 |
| 632 | Waste Separation Facility | structure or facility | L1 | not_applicable | Resistance | 14,025,442.10 |
| 380 | Windbreak/Shelterbelt Establishment | boundary practice | L3 | 4 | Transformation | 13,363,897.04 |
| 558 | Roof Runoff Structure | structure or facility | L1 | 2 | Resistance | 11,683,209.16 |
| 633 | Waste Recycling | in-situ practice on managed land | L2 | 1 | Resistance | 11,190,006.37 |
| 629 | Waste Treatment | boundary practice | L1 | not_applicable | Resistance | 9,941,972.80 |
| 650 | Windbreak/Shelterbelt Renovation | boundary practice | L3 | 4 | Transformation | 9,539,716.98 |
| 468 | Lined Waterway or Outlet | structure or facility | L1 | 2 | Resistance | 9,495,999.48 |
| 362 | Diversion | in-situ practice on managed land | L1 | 1 | Resistance | 9,141,716.51 |
| 383 | Fuel Break | boundary practice | not_applicable | not_applicable | Resistance | 9,060,168.97 |
| 670 | Lighting System Improvement | structure or facility | L1 | not_applicable | Resistance | 8,807,566.65 |
| 396 | Aquatic Organism Passage | structure or facility | not_applicable | not_applicable | Resilience | 8,588,126.80 |
| 655 | Forest Trails and Landings | boundary practice | not_applicable | not_applicable | Resistance | 8,556,729.65 |
| 462 | Precision Land Forming | in-situ practice on managed land | L1 | 2 | Resistance | 8,006,052.12 |
| 395 | Stream Habitat Improvement and Management | boundary practice | not_applicable | not_applicable | Resilience | 7,278,270.58 |
| 660 | Tree/Shrub Pruning | in-situ practice on managed land | L1 | not_applicable | Resilience | 6,612,463.29 |
| 584 | Channel Bed Stabilization | boundary practice | L1 | not_applicable | Resistance | 6,038,450.54 |
| 644 | Wetland Wildlife Habitat Management | in-situ practice on managed land | L3 | 4 | Transformation | 6,032,924.78 |
| 574 | Spring Development | structure or facility | L1 | not_applicable | Resistance | 5,898,921.03 |
| 466 | Land Smoothing | in-situ practice on managed land | L1 | NEG | Resistance | 5,869,533.74 |
| 428A | Irrigation Water Conveyance, Ditch and Canal Lining, Plain Concrete | structure or facility | L1 | not_applicable | Resistance | 5,678,840.16 |
| 366 | Anaerobic Digester | structure or facility | not_applicable | not_applicable | Resistance | 5,522,517.41 |
| 521D | Pond Sealing or Lining, Compacted Clay Treatment | structure or facility | not_applicable | not_applicable | Resistance | 5,490,022.43 |
| 122 | Agricultural Energy Management Plan, Headquarters - Written | plan | none | none | none | 5,391,592.40 |
| 128 | Agricultural Energy Management Plan - Written | plan | none | none | none | 4,559,478.11 |
| 447 | Irrigation System, Tailwater Recovery | structure or facility | L1 | not_applicable | Resistance | 4,511,113.71 |
| 391 | Riparian Forest Buffer | in-situ practice on managed land | L3 | 4 | Resilience | 4,405,594.04 |
| 104 | Nutrient Management Plan - Written | plan | none | none | Resistance | 3,966,930.06 |
| 511 | Forage Harvest Management | in-situ practice on managed land | L1 | 1 | Resistance | 3,702,926.53 |
| 373 | Dust Control on Unpaved Roads and Surfaces | boundary practice | not_applicable | not_applicable | Resistance | 2,937,184.11 |
| 350 | Sediment Basin | structure or facility | not_applicable | not_applicable | Resistance | 2,932,215.06 |
| 370 | Atmospheric Resource Quality Management | none | none | none | none | 2,897,414.60 |
| 610 | Toxic Salt Reduction | none | none | none | none | 2,873,851.18 |
| 610 | Salinity and Sodic Soil Management | in-situ practice on managed land | L2 | 1 | Resistance | 2,873,851.18 |
| 431 | Above Ground, Multi-Outlet Pipeline | none | none | none | none | 2,811,931.90 |
| 636 | Water Harvesting Catchment | structure or facility | L1 | not_applicable | Resistance | 2,652,191.28 |
| 635 | Vegetated Treatment Area | boundary practice | L3 | 4 | Resistance | 2,649,076.51 |
| 460 | Land Clearing | in-situ practice on managed land | not_applicable | NEG | Resistance | 2,405,839.28 |
| 351 | Well Decommissioning | structure or facility | not_applicable | not_applicable | Resistance | 2,389,910.82 |
| 326 | Clearing and Snagging | in-situ practice on managed land | L1 | 2 | Resistance | 2,350,071.67 |
| 576 | Livestock Shelter Structure | structure or facility | L1 | 2 | Resistance | 2,167,398.10 |
| 344 | Residue Management, Seasonal | none | none | none | none | 2,138,675.03 |
| 422 | Hedgerow Planting | boundary practice | L3 | 4 | Resilience | 2,102,847.37 |
| 319 | On-Farm Secondary Containment Facility | structure or facility | L1 | not_applicable | Resistance | 2,055,333.89 |
| 324 | Deep Tillage | in-situ practice on managed land | L1 | 1 | Resistance | 1,961,693.59 |
| 138 | Conservation Plan Supporting Organic Transition - Written | plan | none | none | none | 1,801,301.80 |
| 359 | Waste Treatment Lagoon | structure or facility | not_applicable | not_applicable | Resistance | 1,692,819.15 |
| 582 | Open Channel | boundary practice | L1 | not_applicable | Resistance | 1,690,102.22 |
| 552 | Irrigation Regulating Reservoir | none | none | none | none | 1,684,797.37 |
| 118 | Irrigation Water Management Plan - Written | plan | none | none | none | 1,578,595.20 |
| 548 | Grazing Land Mechanical Treatment | in-situ practice on managed land | L1 | NEG | Resistance | 1,544,012.07 |
| 348 | Dam, Diversion | structure or facility | not_applicable | not_applicable | Resilience | 1,520,421.92 |
| 657 | Wetland Restoration | in-situ practice on managed land | L3 | 4 | Transformation | 1,459,018.08 |
| 386 | Field Border | boundary practice | L3 | 4 | Resilience | 1,441,049.63 |
| 522 | Pond Sealing or Lining, Concrete | structure or facility | not_applicable | not_applicable | Resistance | 1,327,196.67 |
| 150 | Spill Prevention, Control and Countermeasure (SPCC) Plan - Written | plan | none | none | Resistance | 1,308,292.51 |
| 649 | Structures for Wildlife | structure or facility | L3 | not_applicable | Resilience | 1,304,616.79 |
| 400 | Bivalve Aquaculture Gear and Biofouling Control | plan | not_applicable | not_applicable | Resistance | 1,229,819.09 |
| 376 | Field Operations Emissions Reduction | in-situ practice on managed land | L1 | 2 | Resistance | 1,190,413.78 |
| 381 | Silvopasture Establishment | in-situ practice on managed land | L3 | 4 | Transformation | 1,176,972.83 |
| 572 | Spoil Spreading | boundary practice | not_applicable | not_applicable | Resistance | 1,103,585.10 |
| 568 | Trails and Walkways | none | none | none | none | 1,046,998.44 |
| 333 | Amending Soil Properties with Gypsum Products | in-situ practice on managed land | L1 | 1 | Resistance | 992,078.18 |
| 110 | Grazing Management Plan - Written | plan | none | none | none | 945,150.47 |
| 124 | Agricultural Energy Management Plan, Landscape - Written | plan | none | none | none | 942,904.11 |
| 202 | Edge-of-Field Water Quality Monitoring-System Installation | monitoring | none | none | none | 934,729.25 |
| 397 | Aquaculture Ponds | structure or facility | not_applicable | not_applicable | Transformation | 871,697.49 |
| 601 | Vegetative Barrier | in-situ practice on managed land | L3 | 4 | Resistance | 833,230.46 |
| 297 | Feral Swine Management Conservation Activity - Interim | structure or facility | none | none | none | 819,755.16 |
| 154 | IPM Herbicide Resistance Weed Conservation Plan - Written | plan | none | none | none | 774,976.92 |
| 521B | Pond Sealing or Lining, Soil Dispersant | structure or facility | not_applicable | not_applicable | Resistance | 770,456.58 |
| 607 | Surface Drain, Field Ditch | structure or facility | L1 | not_applicable | Resistance | 761,915.52 |
| 554 | Drainage Water Management | in-situ practice on managed land | L1 | not_applicable | Resistance | 690,223.85 |
| 114 | Integrated Pest Management Plan - Written | plan | none | none | none | 628,060.12 |
| 658 | Wetland Creation | in-situ practice on managed land | L3 | 4 | Transformation | 592,683.02 |
| 379 | Multi-Story Cropping | in-situ practice on managed land | L3 | 4 | Transformation | 514,422.70 |
| 402 | Dam | structure or facility | L1 | not_applicable | Resistance | 461,361.00 |
| 346 | Residue and Tillage Management, Ridge Till | in-situ practice on managed land | L2 | 2 | Resilience | 451,894.99 |
| 592 | Feed Management | in-situ practice on managed land | L1 | not_applicable | Resistance | 450,726.24 |
| 608 | Surface Drain, Main or Lateral | structure or facility | L1 | not_applicable | Resistance | 449,517.77 |
| 322 | Channel Bank Vegetation | none | none | none | none | 422,328.88 |
| 393 | Filter Strip | boundary practice | L3 | 4 | Resistance | 397,763.86 |
| 654 | Road/Trail/Landing Closure and Treatment | boundary practice | L3 | 4 | Resistance | 396,771.30 |
| 365 | Anaerobic Digestor, Ambient Temperature | structure or facility | not_applicable | not_applicable | Resistance | 391,540.00 |
| 142 | Fish and Wildlife Habitat Plan - Written | plan | none | none | none | 387,721.12 |
| 521C | Pond Sealing or Lining, Bentonite Sealant | structure or facility | not_applicable | not_applicable | Resistance | 382,467.71 |
| 527 | Karst Sinkhole Treatment | boundary practice | L3 | 4 | Resistance | 336,894.74 |
| 388 | Irrigation Field Ditch | boundary practice | L1 | not_applicable | Resistance | 332,738.67 |
| 146 | Pollinator Habitat Plan - Written | plan | none | none | none | 331,682.21 |
| 368 | Emergency Animal Mortality Management | structure or facility | not_applicable | not_applicable | Resistance | 320,407.15 |
| 130 | Drainage Water Management Plan - Written | plan | none | none | none | 314,371.23 |
| 390 | Riparian Herbaceous Cover | boundary practice | L3 | 4 | Resilience | 311,341.31 |
| 520 | Pond Sealing or Lining, Compacted Soil Treatment | structure or facility | not_applicable | not_applicable | Resistance | 308,714.49 |
| 570 | Stormwater Runoff Control | boundary practice | L1 | 2 | Resistance | 294,693.58 |
| 585 | Stripcropping | in-situ practice on managed land | L3 | 4 | Resilience | 235,210.31 |
| 430FF | Irrigation Water Conveyance, Pipeline, Steel | structure or facility | L1 | not_applicable | Resistance | 231,813.15 |
| 430CC | Irrigation Water Conveyance, Pipeline, Nonreinforced Concrete | structure or facility | L1 | not_applicable | Resistance | 223,662.59 |
| 330 | Contour Farming | in-situ practice on managed land | L1 | 2 | Resistance | 203,071.12 |
| 659 | Wetland Enhancement | in-situ practice on managed land | L3 | 4 | Transformation | 198,592.91 |
| 423 | Hillside Ditch | boundary practice | L1 | not_applicable | Resistance | 191,538.23 |
| 656 | Constructed Wetland | in-situ practice on managed land | L3 | 4 | Transformation | 155,530.65 |
| 605 | Denitrifying Bioreactor | structure or facility | L3 | not_applicable | Resistance | 103,295.95 |
| 457 | Mine Shaft and Adit Closing | structure or facility | not_applicable | not_applicable | Resistance | 102,773.76 |
| 332 | Contour Buffer Strips | in-situ practice on managed land | L3 | 4 | Resistance | 87,419.60 |
| 398 | Fish Raceway or Tank | structure or facility | not_applicable | not_applicable | Resistance | 78,073.76 |
| 112 | Prescribed Burning Plan - Written | plan | none | none | none | 68,726.29 |
| 603 | Herbaceous Wind Barriers | in-situ practice on managed land | L3 | 4 | Resilience | 64,980.12 |
| 630 | Vertical Drain | structure or facility | L1 | not_applicable | Resistance | 61,774.05 |
| 355 | Groundwater Testing | monitoring | not_applicable | not_applicable | Resistance | 61,099.66 |
| 557 | Row Arrangement | in-situ practice on managed land | L1 | 2 | Resistance | 59,909.35 |
| 320 | Irrigation Canal or Lateral | structure or facility | L1 | not_applicable | Resistance | 59,351.90 |
| 609 | Surface Roughening | in-situ practice on managed land | L1 | 2 | Resistance | 56,293.36 |
| 409 | Prescribed Forestry | none | none | none | Resistance | 55,614.75 |
| 331 | Contour Orchard and Other Perennial Crops | in-situ practice on managed land | L1 | 2 | Resistance | 37,822.45 |
| 311 | Alley Cropping | in-situ practice on managed land | L3 | 4 | Transformation | 28,973.62 |
| 428B | Irrigation Water Conveyance, Ditch and Canal Lining, Flexible Membrane | structure or facility | L1 | not_applicable | Resistance | 28,969.90 |
| 450 | Anionic Polyacrylamide (PAM) Application | in-situ practice on managed land | L1 | 2 | Resistance | 18,578.60 |
| 353 | Monitoring Well | structure or facility | not_applicable | not_applicable | Resistance | 14,609.10 |
| 310 | Bedding | in-situ practice on managed land | L1 | 1 | Resistance | 13,505.06 |
| 310 | Edge-of-Field Water Quality Monitoring-Data Collection and Evaluation | plan | none | none | none | 13,505.06 |
| 604 | Saturated Buffer | structure or facility | L1 | not_applicable | Resistance | 13,116.14 |
| 640 | Waterspreading | boundary practice | L1 | not_applicable | Resistance | 8,418.74 |
| 432 | Dry Hydrant | structure or facility | not_applicable | not_applicable | Resistance | 5,112.00 |
| 588 | Cross Wind Ridges | in-situ practice on managed land | L1 | 2 | Resistance | 3,200.80 |
| 134 | Conservation Plan Supporting Transition from Irrigation to Dry-land Plan - Written | plan | none | none | none | 2,364.00 |
| 100 | Comprehensive Nutrient Management Plan | plan | none | none | none | 1,200.00 |
| 108 | Feed Management Plan - Written | plan | none | none | none | NA |
| 312 | Waste Management System | structure or facility | none | none | none | NA |
| 318 | Short Term Storage of Animal Waste and Byproducts | structure or facility | L1 | not_applicable | Resistance | NA |
| 329A | Residue Management, No-Till/Strip Till | in-situ practice on managed land | L2 | 2 | Resilience | NA |
| 329B | Residue Management, Mulch Till | in-situ practice on managed land | L2 | 2 | Resilience | NA |
| 329C | Residue Management, Ridge Till | in-situ practice on managed land | L2 | 2 | Resilience | NA |
| 334 | Controlled Traffic Farming | boundary practice | L1 | 2 | Resistance | NA |
| 375 | DUST CONTROL FROM ANIMAL ACTIVITY ON OPEN LOT SURFACES | in-situ practice on managed land | not_applicable | not_applicable | Resistance | NA |
| 399 | Fishpond Management | plan | not_applicable | not_applicable | Resistance | NA |
| 428C | Irrigation Water Conveyance, Ditch and Canal Lining, Galvanized Steel | structure or facility | L1 | not_applicable | Resistance | NA |
| 430AA | Irrigation Water Conveyance, Pipeline, Aluminum Tubing | structure or facility | L1 | not_applicable | Resistance | NA |
| 430GG | Irrigation Water Conveyance, Pipeline, Reinforced Plastic Mortar | structure or facility | L1 | not_applicable | Resistance | NA |
| 430HH | Irrigation Water Conveyance, Pipeline, Rigid Gated Pipeline | structure or facility | L1 | not_applicable | Resistance | NA |
| 528A | Prescribed Grazing | in-situ practice on managed land | L3 | 4 | Resilience | NA |
| 555 | Rock Barrier | boundary practice | L2 | 2 | Resistance | NA |
| 562 | Recreation Area Improvement | boundary practice | L3 | not_applicable | Resistance | NA |
| 571 | Soil Salinity Management-Nonirrigated | none | none | none | none | NA |
| 586 | Stripcropping, Field | none | none | none | none | NA |
| 589A | Cross Wind Ridges | none | none | none | none | NA |
| 589B | Cross Wind Stripcropping | none | none | none | none | NA |
| 589C | Cross Wind Trap Strips | in-situ practice on managed land | L3 | 4 | Resistance | NA |
| 648 | Wildlife Watering Facility | none | none | none | none | NA |
| *700* | *Fish Screen* | *none* | *none* | *none* | *none* | *NA* |
| *701* | *Agricultural Fuel Containment Facility* | *none* | *none* | *none* | *none* | *NA* |
| *702* | *Agrichemical Mixing Facility* | *none* | *none* | *none* | *none* | *NA* |
| *704* | *Agroforestry Planting* | *none* | *none* | *none* | *none* | *NA* |
| *705* | *Air Management* | *none* | *none* | *none* | *none* | *NA* |
| *706* | *Shellfish Aquaculture Management* | *none* | *none* | *none* | *none* | *NA* |
| *707* | *Barnyard Runoff Management* | *none* | *none* | *none* | *none* | *NA* |
| *708* | *Cistern* | *none* | *none* | *none* | *none* | *NA* |
| *709* | *Forest Land Management* | *none* | *none* | *none* | *none* | *NA* |
| *710* | *Coastal Wetland Vegetation Establishment* | *none* | *none* | *none* | *none* | *NA* |
| *710* | *Agricultural Secondary Containment Facility* | *none* | *none* | *none* | *none* | *NA* |
| *713* | *Dune Stabilization* | *none* | *none* | *none* | *none* | *NA* |
| *713* | *Fueling Facility, Above Ground Storage* | *none* | *none* | *none* | *none* | *NA* |
| *716* | *Renewable Energy System* | *none* | *none* | *none* | *none* | *NA* |
| *717* | *Livestock Shade Structure* | *none* | *none* | *none* | *none* | *NA* |
| *718* | *Precision Pest Control Application* | *none* | *none* | *none* | *none* | *NA* |
| *719* | *Milking Center Wastewater Treatment System* | *none* | *none* | *none* | *none* | *NA* |
| *720* | *Pollution Retention Reservoir* | *none* | *none* | *none* | *none* | *NA* |
| *720* | *Controlled Traffic Farming* | *none* | *none* | *none* | *none* | *NA* |
| *721* | *Rangeland Fertilization* | *none* | *none* | *none* | *none* | *NA* |
| *722* | *Road/Landing Removal* | *none* | *none* | *none* | *none* | *NA* |
| *723* | *Engine Replacement* | *none* | *none* | *none* | *none* | *NA* |
| *724* | *Water Treatment Facility* | *none* | *none* | *none* | *none* | *NA* |
| *724* | *Roofing for Runoff Control* | *none* | *none* | *none* | *none* | *NA* |
| *725* | *Sinkhole and Sinkhole Area Treatment* | *none* | *none* | *none* | *none* | *NA* |
| *727* | *Snow Harvesting* | *none* | *none* | *none* | *none* | *NA* |
| *728* | *Stream Crossing* | *none* | *none* | *none* | *none* | *NA* |
| *729* | *Dust Control on Unpaved Roads and Surfaces* | *none* | *none* | *none* | *none* | *NA* |
| *730* | *Controlled Stream access for Livestock Watering* | *none* | *none* | *none* | *none* | *NA* |
| *731* | *Well Testing* | *none* | *none* | *none* | *none* | *NA* |
| *734* | *Fish and Wildlife Structure* | *none* | *none* | *none* | *none* | *NA* |
| *735* | *Covered Anaerobic Lagoon* | *none* | *none* | *none* | *none* | *NA* |
| *735* | *Waste Gassification Facility* | *none* | *none* | *none* | *none* | *NA* |
| *736* | *Crop By-Product Transfer* | *none* | *none* | *none* | *none* | *NA* |
| *737* | *Reduced Water and Energy Coffee Conveyance System* | *none* | *none* | *none* | *none* | *NA* |
| *738* | *Soil Salinity Control* | *none* | *none* | *none* | *none* | *NA* |
| *739* | *Hillside Bench* | *none* | *none* | *none* | *none* | *NA* |
| *739* | *VEGETATED SUBSURFACE DRAIN OUTLET* | *none* | *none* | *none* | *none* | *NA* |
| *740* | *Pond Sealing and Lining, Soil Cement* | *none* | *none* | *none* | *none* | *NA* |
| *741* | *Grass Buffer Strip* | *none* | *none* | *none* | *none* | *NA* |
| *742* | *Cut Bank Stabilization* | *none* | *none* | *none* | *none* | *NA* |
| *743* | *Improved Water Application* | *none* | *none* | *none* | *none* | *NA* |
| *744* | *Land Grading* | *none* | *none* | *none* | *none* | *NA* |
| *745* | *Stream Corridor Improvement* | *none* | *none* | *none* | *none* | *NA* |
| *747* | *Denitrifying Bioreactor* | *none* | *none* | *none* | *none* | *NA* |
| *748* | *Record Keeping* | *none* | *none* | *none* | *none* | *NA* |
| *749* | *Waste Field Storage Area* | *none* | *none* | *none* | *none* | *NA* |
| *751* | *Individual Terrace* | *none* | *none* | *none* | *none* | *NA* |
| *752* | *Orchard and Vinyard Air Quality Management* | *none* | *none* | *none* | *none* | *NA* |
| *753* | *Infiltration Ditches* | *none* | *none* | *none* | *none* | *NA* |
| *754* | *Irrigation Water Conveyance, Anionic Polyacrylamide Ditch and Canal Treatment* | *none* | *none* | *none* | *none* | *NA* |
| *755* | *Well Plugging* | *none* | *none* | *none* | *none* | *NA* |
| *756* | *Field Operations Emissions Reduction* | *none* | *none* | *none* | *none* | *NA* |
| *756* | *Surface Flooding of Organic Soils* | *none* | *none* | *none* | *none* | *NA* |
| *757* | *Livestock Use Area Protection* | *none* | *none* | *none* | *none* | *NA* |
| *758* | *Structure Sediment Removal* | *none* | *none* | *none* | *none* | *NA* |
| *758* | *Strip - Intercropping* | *none* | *none* | *none* | *none* | *NA* |
| *759* | *Riparian Buffers - Vegetative* | *none* | *none* | *none* | *none* | *NA* |
| *760* | *Surface Wetting* | *none* | *none* | *none* | *none* | *NA* |
| *762* | *Planned Grazing System* | *none* | *none* | *none* | *none* | *NA* |
| *764* | *Rinsate Management* | *none* | *none* | *none* | *none* | *NA* |
| *765* | *Silage Leachate Collection and Transfer* | *none* | *none* | *none* | *none* | *NA* |
| *769* | *Incinerator* | *none* | *none* | *none* | *none* | *NA* |
| *770* | *Livestock Confinement Facility* | *none* | *none* | *none* | *none* | *NA* |
| *770* | *Snow Fence* | *none* | *none* | *none* | *none* | *NA* |
| *771* | *Temporary Steel Windbreak* | *none* | *none* | *none* | *none* | *NA* |
| *774* | *Pothole-Wetland for Wildlife* | *none* | *none* | *none* | *none* | *NA* |
| *775* | *Restoration of Compacted Soils* | *none* | *none* | *none* | *none* | *NA* |
| *775* | *Drainage Ditch Covering* | *none* | *none* | *none* | *none* | *NA* |
| *776* | *Irrigation Water Conveyance, On-Ground Aluminum Pipleline* | *none* | *none* | *none* | *none* | *NA* |
| *777* | *Residue Management -Direct Seed* | *none* | *none* | *none* | *none* | *NA* |
| *778* | *Long Term No. Till* | *none* | *none* | *none* | *none* | *NA* |
| *779* | *Livestock Cooling Pond* | *none* | *none* | *none* | *none* | *NA* |
| *780* | *Irrigation Water Conveyance, Corrugated Metal Pipeline* | *none* | *none* | *none* | *none* | *NA* |
| *782* | *Phosphorous Removal System* | *none* | *none* | *none* | *none* | *NA* |
| *782* | *Storage Facility-Nursery Substrate* | *none* | *none* | *none* | *none* | *NA* |
| *783* | *Pathogen Management* | *none* | *none* | *none* | *none* | *NA* |
| *784* | *Waste Water & Feedlot Runoff Control* | *none* | *none* | *none* | *none* | *NA* |
| *785* | *Corral Dust Control (no. and ac.)* | *none* | *none* | *none* | *none* | *NA* |
| *786* | *Alum treatment of Poultry Litter* | *none* | *none* | *none* | *none* | *NA* |
| *787* | *Storm Water Wet Detention/ Chemical Treatment System* | *none* | *none* | *none* | *none* | *NA* |
| *789* | *Transition to Organic Production* | *none* | *none* | *none* | *none* | *NA* |
| *790* | *Grade Stabilization Structure-Tire Bales* | *none* | *none* | *none* | *none* | *NA* |
| *791* | *Silvopasture Establishment* | *none* | *none* | *none* | *none* | *NA* |
| *794* | *Irrigation Water Conveyance, Corrugated, Ribbed or Profile wall thermal pipeline* | *none* | *none* | *none* | *none* | *NA* |
| *797* | *Invasive Plant Species Control* | *none* | *none* | *none* | *none* | *NA* |
| *797* | *Irrigation Water Conveyance, Correugated Metal Pipeline* | *none* | *none* | *none* | *none* | *NA* |
| *798* | *Seasonal High Tunnel System for Crops* | *none* | *none* | *none* | *none* | *NA* |
